# Supplementary material for: Antivenomics and in vivo preclinical efficacy of six Latin American antivenoms towards south-western Colombian Bothrops asper lineage venoms
Source: PLoS Negl Trop Dis. 2021 Feb 1;15(2):e0009073. doi: 10.1371/journal.pntd.0009073 (PMC7877754; doi:10.1371/journal.pntd.0009073)
Supplement: S14 Table — Maximal binding for each RP-HPLC fraction is highlighted in yellow background. Green background, amount (in μg) of toxin family proteins immunoretained in the affinity columns. (XLSX) [file pntd.0009073.s017.xlsx]

## Sheet: S14 Table
		S14 Table. Concentration-dependent immunoretained (RET) B. ayerbei (Cauca) venom proteins by INS-COL antivenom affinity column. Maximal binding for each RP-HPLC fraction is highlighted in yellow background. Green background, amount (in µg) of toxin family proteins immunoretained in the affinity columns.
					B. ayerbei total venom proteins (µg)								Calculation of the average MolMass for bound toxins [kDa]
		RP-HPLC fraction			100	300	600	900	1200		Toxin class		% of total binding	Average M [kDa]	ʃMolMass
		1		mg TOTAL	12.327	36.981	73.962	110.943	147.924		SVMPi, BPP		0.498239	3.788	0.0188733
				mg RET	0.496739	1.27189	2.35862	2.12727	2.1678
		2		mg TOTAL	3.379	10.137	20.274	30.411	40.548		SVMPi, Dis		0.999274	7.454	0.0744859
				mg RET	2.4505	2.90905	4.26575	4.73047	4.7
		3		mg TOTAL	7.258	21.774	43.548	65.322	87.096		BPP		1.65406	5.759	0.0952575
				mg RET	0.304234	1.14254	3.9154	6.3532	7.83019
		4		mg TOTAL	15.113	45.339	90.678	136.017	181.356		DC-Fragment		20.9553	23.1373	4.84848
				mg RET	15.113	32.0768	49.6004	72.8754	99.2004
		5		mg TOTAL	1.705	5.115	10.23	15.345	20.46		CRISP, SVSP, PLA2-D49		4.32201	30	1.2966
				mg RET	1.705	5.115	10.23	15.345	20.46
		6		mg TOTAL	1.399	4.197	8.394	12.591	16.788		SVSP, SVMP		3.28759	31	1.01915
				mg RET	1.399	4.197	8.394	12.2927	15.5632
		7		mg TOTAL	5.08	15.24	30.48	45.72	60.96		SVSP, SVMP		8.34543	32	2.67054
				mg RET	5.08	15.24	29.6804	35.3683	39.5065
		8		mg TOTAL	0.483	1.449	2.898	4.347	5.796		SVMP, CTL		0.970981	16	0.155357
				mg RET	0.483	1.449	2.898	3.81387	4.59654
		9		mg TOTAL	2.966	8.898	17.796	26.694	35.592		SVMP, CTL		4.75703	16	0.761125
				mg RET	2.966	8.898	16.9046	20.3535	22.5194
		10		mg TOTAL	14.48	43.44	86.88	130.32	173.76		SVMP, LAO, CTL		30.1421	55	16.5781
				mg RET	14.48	43.44	86.6166	121.862	142.69
		11		mg TOTAL	3.291	9.873	19.746	29.619	39.492		SVMP, SVSP, PDE, CTL		4.77411	66	3.15091
				mg RET	3.06401	9.873	19.1508	22.6002	22.2174
		12		mg TOTAL	12.407	37.221	74.442	111.663	148.884		SVMP		6.7931	50	3.39655
				mg RET	12.0397	31.9768	32.158	19.2428	13.591
		13		mg TOTAL	18.41	55.23	110.46	165.69	220.92		SVMP		8.39871	50	4.19935
				mg RET	17.7284	39.7587	23.0378	23.9787	27.0332
		14		mg TOTAL	1.703	5.109	10.218	15.327	20.436		SVMP, LAO, CTL		4.10212	45.5	1.86647
				mg RET	1.703	5.109	10.218	15.1308	19.4191
								Total	473.391					Ʃʃ =	40.1313
		8 mg INS-COL antivenom immunoretained ≥ 473.39 μg B. ayerbei venom proteins (≥ 59.17 mg venom/ g antivenom)
		Mean AV concentration = 56.8 mg/mL (568 mg/vial); Maximal binding capacity per vial: ≥ 33.61 mg B. ayerbei venom proteins
		Mave Bay Toxin: 40.1 kDa (calculated from Mora-Obando et al. J.Proteomics 229 (2020) 103945, and this work)
		33.61 mg = 0.838 x 10-6 moles venom proteins
		Mave IgG: 160 kDa
		1 Ag-binding site occupied: (0.838 x 10-6 moles) x 160 g/mol = 134.10 mg IgG INS-COL/vial
		(134.10/568) x 100 = 23.61% Bay toxin-binding IgG
		2 Ag-binding sites occupied: (0.419 x 10-6 moles) x 160 g/mol= 67.04 mg IgG INS-COL/vial
		(67.04/568) x 100 = 11.80% Bay toxin-binding IgG
		P (mg/mL): 3.41 (34.1 mg/vial)
		34.1 mg = 0.850 x 10-6 moles Ag-binding sites (1/molecule)= 0.425 x 10-6 moles IgG molecules = 68.03 mg
		(68.03/568) x 100 = 11.98% Acc toxin-neutralising IgG
		11.98/23.61 = 50.74% of Bay toxin-binding IgG molecules
